1 **Nonnegligible role of warming-induced soil drying in regulating warming effect**  
2 **on soil respiration**

3 Enzai Du

4  
5 State Key Laboratory of Earth Surface Processes and Resource Ecology, Faculty of  
6 Geographical Science, Beijing Normal University, Beijing, 100875, China.

7  
8 Corresponding author: Enzai Du, Tel: +86-10-58808085, Email: enzaidu@bnu.edu.cn

9

10 **Abstract**

11 Based on results of a 26-year soil warming experiment (soil temperature being  
12 elevated by 5 °C) in a Harvard hardwood forest, Melillo et al. demonstrated a  
13 four-phase pattern of long-term warming effect on soil respiration, while the  
14 mechanisms were not fully elucidated because they neglected the indirect effect due  
15 to warming-induced soil drying. By showing a significant correlation between  
16 precipitation anomaly and inter-annual variation of warming effect on soil respiration,  
17 we suggest a nonnegligible role of warming-induced soil drying in regulating the  
18 long-term warming effect on soil respiration. Our analysis recommends further efforts  
19 to consider both the direct and indirect (i.e., warming-induced soil drying) warming  
20 effects to gain more in-depth understanding of the long-term soil C dynamics.

21 Understanding the long-term effect of climate warming on soil respiration is a  
 22 prerequisite for the projection of future change in global soil carbon (C) pools and  
 23 their consequent feedbacks to climate change. Based on results of a 26-year soil  
 24 warming experiment (soil temperature being elevated by 5 °C) in a Harvard hardwood  
 25 forest, Melillo et al. (1) proposed a hypothesis of four-phase pattern of soil warming  
 26 effect on soil respiration ( $\Delta R_s = R_{s_{\text{heated}}} - R_{s_{\text{control}}}$ ) and attributed it to soil substrate  
 27 and microbial changes. However, the mechanisms were not fully elucidated because  
 28 the authors improperly neglected the indirect effect due to warming-induced decline  
 29 in soil moisture (Fig. 1).

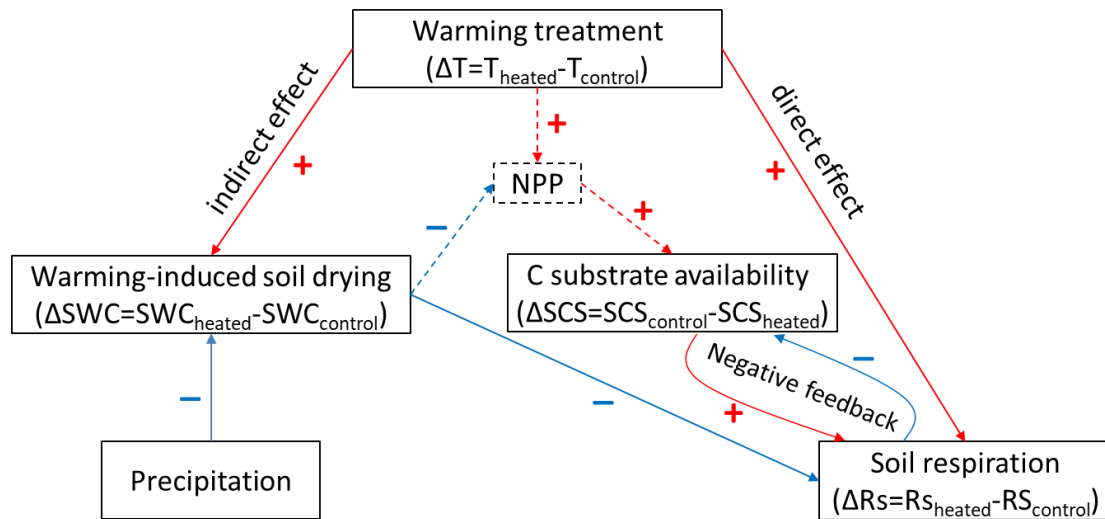

30  
 31 **Figure 1.** A conceptual framework showing the direct and indirect warming effects on  
 32 soil respiration. Precipitation buffers warming-induced soil drying and thus has an  
 33 positive effect on inter-annual variation of  $\Delta R_s$ . Negative feedbacks exist between C  
 34 substrate availability and respirational C loss. Current experiment failed to track the  
 35 direct and indirect warming effects on forest primary productivity (NPP) and  
 36 consequent fresh soil C inputs due to a small plot size (6 x 6 m<sup>2</sup>) (as indicated by  
 37 dashed lines). The symbols “+” in red and “-” in blue indicate positive and negative  
 38 effects, respectively.

39

40 Experimental results have evidenced an essential role of soil moisture in  
 41 regulating the warming effect on soil respiration (2-5). Lower soil moisture can

42 reduce  $\Delta R_s$ , and even leads to negative  $\Delta R_s$ , when soil moisture becomes extremely  
43 limiting to plant roots and soil microbial organisms (Fig. 1; 3-6). In addition to the  
44 direct warming effect (1), warming-induced soil drying (2-6) may indirectly reduce  
45  $\Delta R_s$ , especially in drier years (Fig. 1; 2-5). Moreover, soil moisture stress has been  
46 evidenced to reduce temperature sensitivity of soil respiration (7, 8).  
47 Warming-induced soil drying may have also contributed to a decrease in temperature  
48 sensitivity of soil respiration in heated plots, being observed to occur consistently  
49 across all four phases during the long-term soil warming experiment in Harvard forest  
50 [see Fig. 3 in Melillo et al. (1)]. Unfortunately, we cannot re-analyze the role of  
51 warming-induced soil drying due to unavailable soil moisture data (1).

52 As a primary source of soil moisture, precipitation is expected to buffer the soil  
53 moisture stress and result in a positive effect on inter-annual variation of  $\Delta R_s$  (Fig. 1).  
54 By retrieving data on total annual precipitation (TAP) anomaly (showing no  
55 significant temporal trend,  $p=0.94$ ) and  $\Delta R_s$  from Melillo et al. (1), we tested the  
56 effect of TAP anomaly on inter-annual variation of  $\Delta R_s$ . As  $\Delta R_s$  showed a significant  
57 decrease over time ( $\Delta R_s = -6.1547 \cdot \text{Year} + 12402$ , adjusted  $R^2 = 0.29$ ,  $p=0.005$ ) due  
58 to long-term microbial C substrate depletion (Fig.1; 1, 9, 10), we thus used detrended  
59 (i.e., residual)  $\Delta R_s$  [being calculated as, measured  $\Delta R_{s_i} - (-6.1547 \cdot \text{Year}_i + 12402)$ ,  
60 where  $i$  indicates a specific year] to indicate the inter-annual variation of  $\Delta R_s$ . As  
61 expected, we found a significantly positive effect of precipitation anomaly on the  
62 inter-annual variation of  $\Delta R_s$  (slope =  $0.15 \text{ g C m}^{-2} \text{ year}^{-1}$  per mm; adjusted  $R^2=0.17$ ,  
63  $p=0.03$ ; Fig. 2). Our result suggests a significant role of soil moisture in regulating the  
64 warming effect on soil respiration. It further implies that warming-induced soil drying  
65 stress has very likely exerted a negative effect on the response of soil respiration to  
66 long-term warming treatment in Harvard forest.

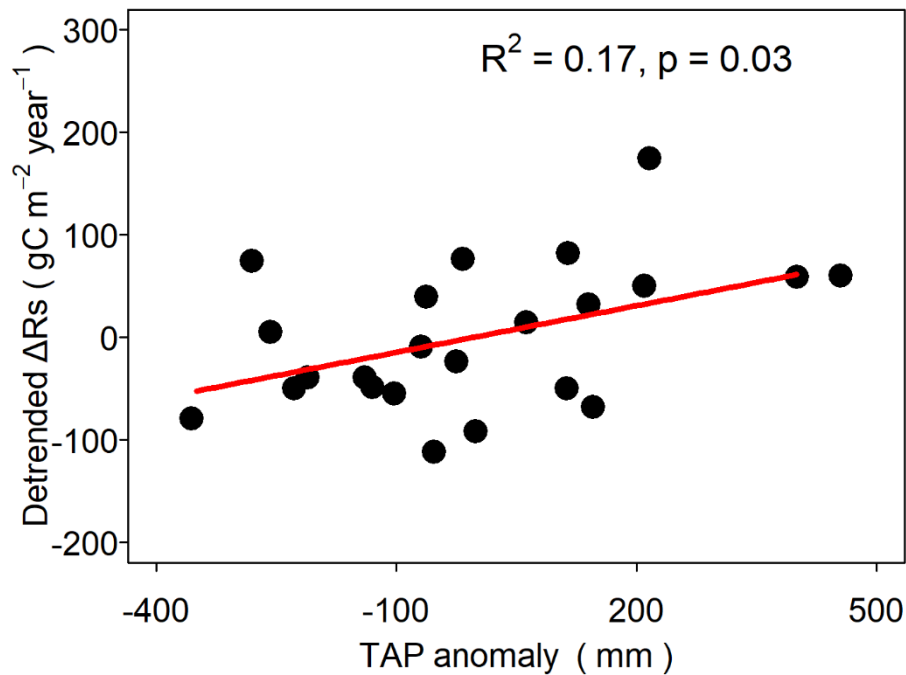

67

68 **Figure 2.** Significant effect of total annual precipitation (TAP) anomaly (mm) on the  
69 inter-annual variation of warming-induced  $\Delta R_s$  ( $\text{g C m}^{-2} \text{ year}^{-1}$ ). Because  $\Delta R_s$   
70 showed a significant decrease over time ( $\Delta R_s = -6.1547 \cdot \text{Year} + 12402$ , adjusted  $R^2 =$   
71  $0.29$ ,  $p=0.005$ ) due to soil C substrate depletion, we used detrended residual [being  
72 calculated as, measured  $\Delta R_{s_i} - (-6.1547 \cdot \text{Year}_i + 12402)$ , where  $i$  indicates a specific  
73 year] to indicate the inter-annual variation of  $\Delta R_s$ . Note that our analysis excluded  
74 data for the years 1995, 2005, 2010 due to warming system failure.

75

76 The long-term experiment, with each plot covering a small area of  $6 \times 6 \text{ m}^2$  (1),  
77 generally represented a scenario of soil C depletion under soil warming, while it failed  
78 to demonstrate the story in a whole C cycle perspective. The small plot size was not  
79 able to track the direct and indirect (i.e., warming-induced soil drying) warming  
80 effects on forest primary productivity (Fig. 1), which could consequently provide  
81 fresh C substrates for soil respiration (11). In that case, negative feedbacks between C  
82 substrate limitation and respirational C loss likely dominate a long-term reduction of  
83  $\Delta R_s$  (9, 10). By inducing a reduction of soil moisture (2-6, 12, 13), soil warming also  
84 indirectly regulates  $\Delta R_s$  via inducing changes in the composition and activity of

85 microbial community (5, 14). For instance, warming-induced soil moisture stress may  
86 have contributed substantially to the declining trends of  $\Delta R_s$  during the relatively drier  
87 periods 1997-2002 and 2015-2016 [see Fig. S2 in Melillo et al. (1)].

88 As the indirect effect due to warming-induced soil drying stress has not been  
89 addressed properly, the mechanisms of the four-stage pattern of long-term warming  
90 effect on soil respiration are likely not fully elucidated (1). Moreover, Melillo et al. (1)  
91 assumed that microbial respiration accounted for a constant proportion  
92 (approximately 2/3) of soil respiration, while they ignored temporal changes in the  
93 microbial proportion over the four-phase pattern of soil respiration. Therefore,  
94 in-depth understanding of the long-term warming effect on soil C dynamics calls for  
95 further efforts to consider both the direct and indirect (i.e., warming-induced soil  
96 drying) effects in a whole C cycle perspective at an ecosystem scale.

97

98 **Acknowledgements:** This work was supported by the National Natural Science  
99 Foundation of China (Nos. 41630750 & 31400381) and State Key Laboratory of  
100 Earth Surface and Resource Ecology (No. 2017-ZY-07).

101 **References:**

- 102 1. J. M. Melillo et al., *Science* **358**, 101-105 (2017).
- 103 2. J.C. Carey et al., *PNAS* **113**, 13797-13802 (2016).
- 104 3. G. Li et al., *Forests* **8**, 56 (2017).
- 105 4. W. Liu et al., *Global Change Biol.* **15**, 184-195 (2009).
- 106 5. S. D. Allison et al., *Global Change Biol.* **14**, 2898-2909 (2008).
- 107 6. J. Harte et al., *Ecol. Appl.* **5**, 132–150 (1995).
- 108 7. R.S. Jassal et al., *Global Change Biol.* **14**, 1305–1318 (2008).
- 109 8. A. Gershenson et al., *Global Change Biol.* **15**, 176-183 (2009).
- 110 9. M. U. Kirschbaum *Global Change Biol.* **10**, 1870–1877 (2004).
- 111 10. A. L. Romero-Olivares et al., *Soil Biol. Biochem.* **107**, 32–40 (2017).
- 112 11. A. Hursh et al., *Global Change Biol.* **23**, 2090–2103 (2017).
- 113 12. J. C. Yuste et al., *Tree physiol.* **23**, 1263–1270 (2003).
- 114 13. V. Suseela et al., *Global Change Biol.* **18**, 336–348 (2012).
- 115 14. S. Manzoni et al., *Ecology* **93**, 930–938 (2012).
